# Supplementary material for: Safety of Amlodipine in Early Pregnancy
Source: PubMed Central journal article supplement — J Am Heart Assoc. 2019 Jul 26;8(15):e012093. doi: 10.1161/JAHA.119.012093 (PMC6761676; doi:10.1161/jaha.119.012093), 2019-07-26
Supplement: JAH3-8-e012093-s001.pdf [file JAH3-8-e012093-s001.pdf]

# **SUPPLEMENTAL MATERIAL**

**Table S1. All Anomalies.**

|                                                                                                                                                                                                                                                                                                                                                                                                                                                                                                                                                                                 |                                                                                                                                                                                                                                                                                                                                                                                                                                                                                                                                                                                                                                                                                                                                                                                                                                                                                            |                                                                                                                                                                                                                                                                                                                                                                                                                                                                                                                                                                                                                                                                                                                                                               |
|---------------------------------------------------------------------------------------------------------------------------------------------------------------------------------------------------------------------------------------------------------------------------------------------------------------------------------------------------------------------------------------------------------------------------------------------------------------------------------------------------------------------------------------------------------------------------------|--------------------------------------------------------------------------------------------------------------------------------------------------------------------------------------------------------------------------------------------------------------------------------------------------------------------------------------------------------------------------------------------------------------------------------------------------------------------------------------------------------------------------------------------------------------------------------------------------------------------------------------------------------------------------------------------------------------------------------------------------------------------------------------------------------------------------------------------------------------------------------------------|---------------------------------------------------------------------------------------------------------------------------------------------------------------------------------------------------------------------------------------------------------------------------------------------------------------------------------------------------------------------------------------------------------------------------------------------------------------------------------------------------------------------------------------------------------------------------------------------------------------------------------------------------------------------------------------------------------------------------------------------------------------|
| <p><b>Nervous system</b><br/> Neural Tube Defects:<br/> Anencephalus and similar<br/> Encephalocele<br/> Spina Bifida<br/> Hydrocephalus<br/> Microcephaly<br/> Arhinencephaly / holoprosencephaly<br/> <b>Eye</b><br/> Anophthalmos / microphthalmos<br/> Anophthalmos<br/> Congenital cataract<br/> Congenital glaucoma<br/> <b>Ear, face and neck</b><br/> Anotia<br/> <b>Congenital Heart Defects (CHD)</b><br/> Severe CHD<br/> Common arterial truncus<br/> Transposition of great vessels<br/> Single ventricle<br/> VSD<br/> ASD<br/> AVSD<br/> Tetralogy of Fallot</p> | <p>PDA as only CHD in term infants (LB and GA 37+ weeks)<br/> <b>Respiratory</b><br/> Choanal atresia<br/> Cystic adenomatous malformation of lung<br/> <b>Oro-facial clefts</b><br/> Cleft lip with or without cleft palate<br/> Cleft palate<br/> <b>Digestive system</b><br/> Oesophageal atresia with/without tracheo-oesophageal fistula<br/> Duodenal atresia or stenosis<br/> Atresia or stenosis of other parts of small intestine<br/> Ano-rectal atresia and stenosis<br/> Hirschsprung's disease<br/> Atresia of bile ducts<br/> Annular pancreas<br/> Diaphragmatic hernia<br/> <b>Abdominal wall defects</b><br/> Gastroschisis<br/> Omphalocele<br/> <b>Urinary</b><br/> Bilateral renal agenesis including Potter syndrome<br/> Renal Dysplasia<br/> Congenital hydronephrosis<br/> Bladder exstrophy and/or epispadia<br/> Posterior urethral valve and/or prune belly</p> | <p>Upper limb reduction<br/> Lower limb reduction<br/> Complete absence of a limb<br/> Club foot - talipes equinovarus<br/> Hip dislocation and/or dysplasia<br/> Polydactyly<br/> Syndactyly<br/> <b>Other anomalies/syndromes</b><br/> Skeletal dysplasias<br/> Craniosynostosis<br/> Congenital constriction bands/ amniotic band<br/> Situs inversus<br/> Conjoined twins<br/> Congenital skin disorders<br/> Teratogenic syndromes with malformations<br/> Fetal alcohol syndrome<br/> Valproate syndrome<br/> Maternal infections resulting in malformations<br/> Genetic syndromes + microdeletions<br/> Sequences<br/> <b>Chromosomal</b><br/> Down syndrome<br/> Patau syndrome/trisomy 13<br/> Edwards syndrome/trisomy 18<br/> Turner syndrome</p> |
|---------------------------------------------------------------------------------------------------------------------------------------------------------------------------------------------------------------------------------------------------------------------------------------------------------------------------------------------------------------------------------------------------------------------------------------------------------------------------------------------------------------------------------------------------------------------------------|--------------------------------------------------------------------------------------------------------------------------------------------------------------------------------------------------------------------------------------------------------------------------------------------------------------------------------------------------------------------------------------------------------------------------------------------------------------------------------------------------------------------------------------------------------------------------------------------------------------------------------------------------------------------------------------------------------------------------------------------------------------------------------------------------------------------------------------------------------------------------------------------|---------------------------------------------------------------------------------------------------------------------------------------------------------------------------------------------------------------------------------------------------------------------------------------------------------------------------------------------------------------------------------------------------------------------------------------------------------------------------------------------------------------------------------------------------------------------------------------------------------------------------------------------------------------------------------------------------------------------------------------------------------------|

|                                                                                                                                                                                                                                                                |                                                                              |                      |
|----------------------------------------------------------------------------------------------------------------------------------------------------------------------------------------------------------------------------------------------------------------|------------------------------------------------------------------------------|----------------------|
| Tricuspid atresia and stenosis<br>Ebstein's anomaly<br>Pulmonary valve stenosis<br>Pulmonary valve atresia<br>Aortic valve atresia/stenosis<br>Hypoplastic left heart<br>Hypoplastic right heart<br>Coarctation of aorta<br>Total anomalous pulm venous return | Genital<br>Hypospadias<br>Indeterminate sex<br><b>Limb</b><br>Limb reduction | Klinefelter syndrome |
|----------------------------------------------------------------------------------------------------------------------------------------------------------------------------------------------------------------------------------------------------------------|------------------------------------------------------------------------------|----------------------|

**Table S2. Details of cases using amlodipine during the first trimester (Group A).**

| Case | Total amlodipine dose* (mg)/period in the first trimester | Other antihypertensives in the first trimester | Age at delivery (y.o.) | Gestational age | Birth weight (g) | Super imposed preeclampsia | Birth defects            |
|------|-----------------------------------------------------------|------------------------------------------------|------------------------|-----------------|------------------|----------------------------|--------------------------|
| 1    | 840/ prepregnancy-11w6d                                   | -                                              | 37                     | 38w5d           | 2770             | +                          | -                        |
| 2    | 15/ 11w1d-11w6d                                           | -                                              | 32                     | 37w2d           | 1720             | +                          | -                        |
| 3    | 420/ prepregnancy-11w6d                                   | -                                              | 43                     | 40w3d           | 2978             | -                          | -                        |
| 4    | 350/ prepregnancy-7w6d, 8w0d-11w6d                        | -                                              | 39                     | 38w1d           | 3416             | -                          | -                        |
| 5    | 300/ prepregnancy-11w6d                                   | -                                              | 37                     | 29w0d           | 1075             | -                          | -                        |
| 6    | 175/ prepregnancy-4w6d                                    | -                                              | 41                     | 35w4d           | 1872             | -                          | +<br>Case1<br>in table 3 |
| 7    | 210/ prepregnancy-11w6d                                   | -                                              | 42                     | 37w4d           | 2637             | -                          | -                        |
| 8    | 420/ prepregnancy-11w6d                                   | -                                              | 30                     | 39w4d           | 3086             | -                          | -                        |
| 9    | 107.5/ prepregnancy-6w0d                                  | -                                              | 39                     | 38w5d           | 3240             | -                          | -                        |
| 10   | 420/ prepregnancy-11w6d                                   | -                                              | 37                     | 38w0d           | 3626             | -                          | -                        |
| 11   | 210/ prepregnancy-11w6d                                   | -                                              | 40                     | 40w5d           | 3624             | +                          | -                        |
| 12   | 840/ prepregnancy-11w6d                                   | Prepregnancy-11w6d:Me                          | 39                     | 40w3d           | 3200             | -                          | -                        |
| 13   | 730/ prepregnancy-11w6d                                   | -                                              | 36                     | 38w5d           | 3720             | -                          | -                        |
| 14   | 300/ prepregnancy-11w6d                                   | Prepregnancy-5w0d: ARB<br>5w0d-11w6d: La       | 32                     | 38w4d           | 2998             | -                          | -                        |
| 15   | 420/ prepregnancy-11w6d                                   | -                                              | 35                     | 38w2d           | 2890             | +                          | -                        |

|    |                         |                                               |    |       |      |   |   |
|----|-------------------------|-----------------------------------------------|----|-------|------|---|---|
| 16 | 840/ prepregnancy-11w6d | -                                             | 34 | 38w5d | 3340 | + | - |
| 17 | 420/ prepregnancy-11w6d | 33w4d-11w6d: Me                               | 38 | 37w1d | 2751 | + | - |
| 18 | 840/ prepregnancy-11w6d | Prepregnancy-8w3d: Me                         | 43 | 39w2d | 3618 | - | - |
| 19 | 210/ prepregnancy-11w6d | -                                             | 39 | 38w2d | 3256 | - | - |
| 20 | 420/ prepregnancy-11w6d | -                                             | 40 | 38w2d | 3180 | - | - |
| 21 | 420/ prepregnancy-11w6d | -                                             | 45 | 36w3d | 1936 | + | - |
| 22 | 840/ prepregnancy-11w6d | Prepregnancy-5w0d: ARB<br>pregnancy-11w6d: Me | 29 | 36w6d | 2295 | + | - |
| 23 | 210/ prepregnancy-11w6d | -                                             | 40 | 38w0d | 3154 | - | - |
| 24 | 420/ prepregnancy-11w6d | -                                             | 40 | 38w6d | 2926 | - | - |
| 25 | 420/ prepregnancy-11w6d | -                                             | 40 | 38w4d | 3080 | - | - |
| 26 | 420/ prepregnancy-11w6d | 14w4d-delivery: Me                            | 40 | 38w5d | 2896 | - | - |
| 27 | 840/ prepregnancy-11w6d | Prepregnancy-5w0d: ARB<br>5w0d-delivery: Me   | 35 | 38w4d | 2700 | - | - |
| 28 | 420/ prepregnancy-11w6d | -                                             | 36 | 38w4d | 2726 | - | - |
| 29 | 52.5/ 9w0d-11w6d        | Prepregnancy-5w0d: Aze                        | 32 | 34w5d | 1870 | + | - |
| 30 | 7.5/ 11w4d-11w6d        | -                                             | 29 | 35w2d | 2821 | - | - |
| 31 | 237.5/ 4w5d-11w6d       | -                                             | 40 | 37w6d | 2560 | - | - |

|    |                                         |                                                               |    |       |      |   |                          |
|----|-----------------------------------------|---------------------------------------------------------------|----|-------|------|---|--------------------------|
| 32 | 25/ 11w2d-11w6d                         | 10w6d-11w2d: Me                                               | 28 | 34w6d | 2146 | + | -                        |
| 33 | 220/ 5w5d-11w6d                         | -                                                             | 33 | 40w6d | 3408 | - | -                        |
| 34 | 75/ prepregnancy-4w1d                   | 4w1d-11w6d: Me                                                | 35 | 31w2d | 1134 | + | -                        |
| 35 | 105/ prepregnancy-5w6d                  | 5w6d-delivery: Nif                                            | 38 | 38w0d | 2482 | - | -                        |
| 36 | 107.5/ prepregnancy-6w0d                | Prepregnancy-6w0d: ARB<br>6w0d-delivery: Me<br>9w5d-15w1d: Hy | 37 | 39w3d | 3366 | - | -                        |
| 37 | 420/ prepregnancy-11w6d                 | Prepregnancy-7w6d: ARB<br>11w4d-delivery: Hy                  | 41 | 37w2d | 2348 | + | -                        |
| 38 | 740/ prepregnancy-6w4d, 8w1d-11w6d      | 6w5d-8w0d: Hy                                                 | 36 | 38w0d | 3217 | - | +<br>Case2<br>in table 3 |
| 39 | 840/ prepregnancy-11w6d                 | Prepregnancy-20w3d: La                                        | 42 | 36w6d | 2550 | + | -                        |
| 40 | 197.5/ prepregnancy-4w0d, 9w0d-11w6d    | 4w0d-11w6d: Hy                                                | 36 | 38w6d | 2950 | + | -                        |
| 41 | 160/ prepregnancy-9w0d                  | -                                                             | 39 | 37w6d | 2310 | - | -                        |
| 42 | 325/ prepregnancy-9w1d                  | 9w2d-11w6d: Hy                                                | 36 | 38w4d | 3554 | - | -                        |
| 43 | 295/ prepregnancy-8w2d                  | Prepregnancy-8w2d: ARB                                        | 40 | 35w3d | 1826 | - | -                        |
| 44 | 177.5/ prepregnancy-5w0d,<br>7w0d-11w6d | Prepregnancy-5w0d: Tri<br>7w1d-11w6d: Me                      | 38 | 37w5d | 2698 | - | -                        |
| 45 | NA/ prepregnancy-8w2d                   | 5w2d-11w6d: Hy                                                | 42 | 37w2d | 3170 | + | -                        |

|    |                        |                 |    |       |      |   |   |
|----|------------------------|-----------------|----|-------|------|---|---|
| 46 | 90/ prepregnancy-5w0d  | 5w0d-11w6d: Hy  | 38 | 37w2d | 2536 | - | - |
| 47 | 180/ prepregnancy-5w0d | 5w0d-11w6d: Nif | 45 | 38w1d | 2918 | - | - |
| 48 | 215/ prepregnancy-6w0d | -               | 39 | 39w5d | 2790 | - | - |

\*Total dose was obtained by amlodipine daily dose times the total number of days of amlodipine uses during the first trimester.

Aze indicates azelnidipine; ARB, angiotensin II receptor blocker; Hy, Hydralazine; La, Labetalol; Me, Methyldopa; NA, not available; Nif, Nifedipine; Tri, trichlormethiazide ; y.o., years old.

**Table S3. Delivery outcomes excluding diabetes mellitus.**

|                               |           | <b>Amlodipine<br/>(n=45)</b> | <b>Other<br/>Antihypertensives<br/>(n=53)</b> | <b>No<br/>Antihypertensives<br/>(n=123)</b> | <b><i>P</i></b> |
|-------------------------------|-----------|------------------------------|-----------------------------------------------|---------------------------------------------|-----------------|
| <b>Maternal outcomes</b>      |           |                              |                                               |                                             |                 |
| Gestational diabetes mellitus | N (%)     | 15 (33.3)                    | 13 (24.5)                                     | 40 (32.5)                                   | 0.526           |
| Gestational age (weeks)       | Mean (SD) | 3 (6.7)                      | 8 (15.1)                                      | 24 (19.5)                                   | 0.128           |
| <b>Newborn outcomes</b>       |           |                              |                                               |                                             |                 |
| Gestational age (weeks)       | Mean (SD) | 37.8 (2.17)                  | 36.8 (3.40)                                   | 37.1 (3.67)                                 | 0.387           |
| Delivery weight (g)           | Mean (SD) | 2758.3 (623.90)              | 2494.7 (785.47)                               | 2537.7 (765.27)                             | 0.163           |
| Preterm birth (<37 weeks)     | N (%)     | 9 (20.0)                     | 12 (22.6)                                     | 39 (31.7)                                   | 0.223           |
| Low birth weight (<2500 g)    | N (%)     | 12 (26.7)                    | 24 (45.3)                                     | 47 (38.2)                                   | 0.161           |
| Apgar score                   |           |                              |                                               |                                             |                 |
| 1 min                         | Mean (SD) | 7.9 (0.99)                   | 7.4 (1.98)                                    | 7.6 (1.73)                                  | 0.260           |
| 5 min                         | Mean (SD) | 8.9 (0.45)                   | 8.5 (1.31)                                    | 8.7 (1.25)                                  | 0.224           |
| Birth defects                 | N (%)     | 2 (4.4)                      | 3 (5.7)                                       | 6 (4.9)                                     | 0.960           |

SD indicates standard deviation. There was no statistically significant difference among the groups.



**Table S4. Delivery outcomes including a pair of twins in Group A.**

|                               |           | <b>Amlodipine</b> | <b>Other<br/>antihypertensives</b> | <b>No<br/>antihypertensives</b> | <b><i>P</i></b> |
|-------------------------------|-----------|-------------------|------------------------------------|---------------------------------|-----------------|
| <b>Maternal outcomes</b>      |           | n=49              | n=54                               | n=129                           |                 |
| Superimposed preeclampsia     | N (%)     | 16 (32.7)         | 14 (25.9)                          | 43 (33.3)                       | 0.604           |
| Gestational diabetes mellitus | N (%)     | 3 (6.1)           | 8 (14.8)                           | 24 (18.6)                       | 0.115           |
| <b>Newborn outcomes</b>       |           | n=50              | n=54                               | n=129                           |                 |
| Gestational age (weeks)       | Mean (SD) | 37.8 (2.10)       | 36.9 (3.43)                        | 37.1 (3.65)                     | 0.393           |
| Delivery weight (g)           | Mean (SD) | 2781.1 (607.65)   | 2520.1 (800.09)                    | 2536.0 (759.40)                 | 0.108           |
| Preterm birth (<37 weeks)     | N (%)     | 10 (20.0)         | 12 (22.2)                          | 41 (31.8)                       | 0.186           |
| Low birth weight (<2500 g)    | N (%)     | 12 (24.0)         | 24 (44.4)                          | 49 (38.0)                       | 0.084           |
| Apgar score                   |           |                   |                                    |                                 |                 |
| 1 min                         | Mean (SD) | 8.0 (0.97)        | 7.4 (1.97)                         | 7.6 (1.69)                      | 0.154           |
| 5 min                         | Mean (SD) | 8.9 (0.42)        | 8.5 (1.30)                         | 8.7 (1.22)                      | 0.190           |
| Birth defects                 | N (%)     | 2 (4.0)           | 3 (5.6)                            | 6 (4.7)                         | 0.931           |

SD indicates standard deviation. There was no statistically significant difference among the groups.
